# Supplementary material for: The evolution of Lachancea thermotolerans is driven by geographical determination, anthropisation and flux between different ecosystems
Source: PubMed Central journal article supplement (PMC5599012; doi:10.1371/journal.pone.0184652), 2017-09-14
Supplement: pone.0184652.s001.pdf [file pone.0184652.s001.pdf]

| Species                  | Strain          | Source                 | Isolation origin                                         | Continent/region  | Isolation habitat                                            | Habitat type     | Genetic group         | Reference                  |
|--------------------------|-----------------|------------------------|----------------------------------------------------------|-------------------|--------------------------------------------------------------|------------------|-----------------------|----------------------------|
| <i>L. thermotolerans</i> | 3435            | Auckland University    | New Zealand                                              | Australia/Oceania | grapes                                                       | grape/wine       | Domestic 1            | na                         |
| <i>L. thermotolerans</i> | <b>11/Z-112</b> | University of Debrecen | Slovakia, Mala Trna                                      | Europe            | grapes, mummified                                            | grape/wine       | Mix Europe/N. America | Sipiczki 2016 <sup>a</sup> |
| <i>L. thermotolerans</i> | <b>11/Z-1</b>   | University of Debrecen | Slovakia, Mala Trna                                      | Europe            | grapes, mummified                                            | grape/wine       | Mix Europe/N. America | Sipiczki 2016 <sup>a</sup> |
| <i>L. thermotolerans</i> | 11-27           | University of Debrecen | Slovakia, Mala Trna                                      | Europe            | grapes, mummified                                            | grape/wine       | Mix Europe/N. America | Sipiczki 2016 <sup>a</sup> |
| <i>L. thermotolerans</i> | <b>14/1/Z-2</b> | University of Debrecen | Hungary, Erdőbénye                                       | Europe            | grapes, mummified                                            | grape/wine       | Mix E. Europe         | Sipiczki 2016 <sup>a</sup> |
| <i>L. thermotolerans</i> | <b>2/2/Z-8</b>  | University of Debrecen | Hungary, Sárszadány                                      | Europe            | grapes, mummified                                            | grape/wine       | Mix Europe/N. America | Sipiczki 2016 <sup>a</sup> |
| <i>L. thermotolerans</i> | <b>5/1/Z-7</b>  | University of Debrecen | Hungary, Vinicky                                         | Europe            | grapes, mummified                                            | grape/wine       | Mix Europe/N. America | Sipiczki 2016 <sup>a</sup> |
| <i>L. thermotolerans</i> | <b>8/2/Z-3</b>  | University of Debrecen | Slovakia, Černochoch                                     | Europe            | grapes, mummified                                            | grape/wine       | Mix Europe/N. America | Sipiczki 2016 <sup>a</sup> |
| <i>L. thermotolerans</i> | <b>8/Z-1</b>    | University of Debrecen | Slovakia, Černochoch                                     | Europe            | grapes, mummified                                            | grape/wine       | Mix E. Europe         | Sipiczki 2016 <sup>a</sup> |
| <i>L. thermotolerans</i> | 9/1/Z-4         | University of Debrecen | Slovakia, Mala Trna                                      | Europe            | grapes, mummified                                            | grape/wine       | Mix E. Europe         | Sipiczki 2016 <sup>a</sup> |
| <i>L. thermotolerans</i> | <b>40-193</b>   | Phaff YCC              | USA, California                                          | North America     | grapes, cv. Alicante Bouchet                                 | grape/wine       | Mix Europe/N. America | na                         |
| <i>L. thermotolerans</i> | <b>50-15</b>    | Phaff YCC              | USA, Southern California, Pinon Flats, San Jacinto Mnts. | North America     | <i>Drosophila pseudoobscura</i>                              | insect           | Americas              | na                         |
| <i>L. thermotolerans</i> | <b>51-160</b>   | Phaff YCC              | USA, California, Aspen Valley, Yosemite area             | North America     | <i>Drosophila azteca</i>                                     | insect           | Americas              | na                         |
| <i>L. thermotolerans</i> | <b>51-171</b>   | Phaff YCC              | USA, California, Mather, Yosemite area                   | North America     | <i>Drosophila pseudoobscura</i>                              | insect           | Hawaii/California     | na                         |
| <i>L. thermotolerans</i> | <b>51-176</b>   | Phaff YCC              | USA, California, Mather, Yosemite area                   | North America     | <i>Aulacigaster sp.</i>                                      | insect           | Hawaii/California     | na                         |
| <i>L. thermotolerans</i> | <b>60-260</b>   | Phaff YCC              | USA, UCD campus                                          | North America     | <i>Aulacigaster sp.</i> on <i>Ulmus carpinifolia</i> exudate | insect           | Americas              | na                         |
| <i>L. thermotolerans</i> | 60-373          | Phaff YCC              | USA, Lake Berryessa area                                 | North America     | <i>Drosophila pseudoobscura</i>                              | insect           | Hawaii/California     | na                         |
| <i>L. thermotolerans</i> | <b>61-245</b>   | Phaff YCC              | USA, North California Pacific Coast, Gualala River area  | North America     | <i>Aulacigaster sp.</i>                                      | insect           | Americas              | na                         |
| <i>L. thermotolerans</i> | <b>61-510</b>   | Phaff YCC              | USA, Lake Berryessa area                                 | North America     | <i>Drosophila pseudoobscura</i>                              | insect           | Hawaii/California     | na                         |
| <i>L. thermotolerans</i> | <b>61-518</b>   | Phaff YCC              | USA, Lake Berryessa area                                 | North America     | <i>Drosophila melanogaster</i>                               | insect           | Americas              | na                         |
| <i>L. thermotolerans</i> | <b>68-118</b>   | Phaff YCC              | USA, Yuba City                                           | North America     | conveyer belt scrapings (Sunsweet Prune)                     | agriculture/food | Domestic 1            | na                         |
| <i>L. thermotolerans</i> | <b>68-140</b>   | Phaff YCC              | USA, California                                          | Australia/Oceania | bees                                                         | insect           | Hawaii/California     | na                         |
| <i>L. thermotolerans</i> | <b>72-132</b>   | Phaff YCC              | Hawaii, Ahumoa, Saddle Rd area                           | Australia/Oceania | <i>Myoporum sandwicensis</i> exudate                         | plant            | Hawaii/California     | na                         |

|                          |           |           |                                |                   |                                   |                  |                          |                                |
|--------------------------|-----------|-----------|--------------------------------|-------------------|-----------------------------------|------------------|--------------------------|--------------------------------|
| <i>L. thermotolerans</i> | 72-137    | Phaff YCC | Hawaii, Ahumoa, Saddle Rd area | Australia/Oceania | <i>Myoporum sandwicensexudate</i> | plant            | Hawaii/California        | na                             |
| <i>L. thermotolerans</i> | 72-141    | Phaff YCC | Hawaii, Ahumoa, Saddle Rd area | Australia/Oceania | <i>Myoporum sandwicensexudate</i> | plant            | Hawaii/California        | na                             |
| <i>L. thermotolerans</i> | 72-144    | Phaff YCC | Hawaii, Ahumoa, Saddle Rd area | Australia/Oceania | <i>Myoporum sandwicensexudate</i> | plant            | Hawaii/California        | na                             |
| <i>L. thermotolerans</i> | 72-148    | Phaff YCC | Hawaii, Ahumoa, Saddle Rd area | Australia/Oceania | <i>Myoporum sandwicensexudate</i> | plant            | Hawaii/California        | na                             |
| <i>L. thermotolerans</i> | 72-150    | Phaff YCC | Hawaii, Ahumoa, Saddle Rd area | Australia/Oceania | <i>Myoporum flux</i> clear drip   | plant            | Hawaii/California        | na                             |
| <i>L. thermotolerans</i> | 72-153    | Phaff YCC | Hawaii, Ahumoa, Saddle Rd area | Australia/Oceania | <i>Myoporum flux</i> tacky gum    | plant            | Hawaii/California        | na                             |
| <i>L. thermotolerans</i> | 72-154    | Phaff YCC | Hawaii, Ahumoa, Saddle Rd area | Australia/Oceania | <i>Myoporum sandwicensexudate</i> | plant            | Hawaii/California        | na                             |
| <i>L. thermotolerans</i> | 72-175    | Phaff YCC | Hawaii, Ahumoa, Saddle Rd area | Australia/Oceania | <i>Myoporum sandwicensexudate</i> | plant            | Hawaii/California        | na                             |
| <i>L. thermotolerans</i> | AWRI 1018 | AWMCC     | na                             | na                | na                                | na               | Domestic 1               | na                             |
| <i>L. thermotolerans</i> | AWRI 1019 | AWMCC     | na                             | na                | na                                | na               | Europe oak/France grapes | na                             |
| <i>L. thermotolerans</i> | AWRI 1668 | AWMCC     | na                             | na                | na                                | na               | Domestic 1               | na                             |
| <i>L. thermotolerans</i> | AWRI 1669 | AWMCC     | na                             | na                | na                                | na               | Domestic 1               | na                             |
| <i>L. thermotolerans</i> | AWRI 2009 | AWMCC     | Australia, South Australia     | Australia/Oceania | grapes                            | grape/wine       | Domestic 1               | na                             |
| <i>L. thermotolerans</i> | AWRI 927  | AWMCC     | Italy                          | Europe            | grapes                            | grape/wine       | Domestic 1               | na                             |
| <i>L. thermotolerans</i> | CBS 10516 | CBS-KNAW  | Ukraine                        | Europe            | <i>Quercus sp.</i> exudate        | plant            | Europe oak/France grapes | na                             |
| <i>L. thermotolerans</i> | CBS 10517 | CBS-KNAW  | Ukraine                        | Europe            | <i>Quercus sp.</i> exudate        | plant            | Other                    | na                             |
| <i>L. thermotolerans</i> | CBS 10518 | CBS-KNAW  | Ukraine                        | Europe            | <i>Quercus sp.</i> exudate        | plant            | Mix E. Europe            | na                             |
| <i>L. thermotolerans</i> | CBS 10519 | CBS-KNAW  | Ukraine                        | Europe            | <i>Quercus sp.</i> exudate        | plant            | Mix Europe/N. America    | Freel et al. 2014 <sup>b</sup> |
| <i>L. thermotolerans</i> | CBS 10520 | CBS-KNAW  | Russia                         | Russia/Asia       | <i>Quercus sp.</i> exudate        | plant            | Other                    | Freel et al. 2014 <sup>b</sup> |
| <i>L. thermotolerans</i> | CBS 10521 | CBS-KNAW  | Finland                        | Europe            | <i>Quercus sp.</i> exudate        | plant            | Europe oak/France grapes | Freel et al. 2014 <sup>b</sup> |
| <i>L. thermotolerans</i> | CBS 137   | CBS-KNAW  | Netherlands                    | Europe            | date                              | agriculture/food | Domestic 1               | Freel et al. 2014 <sup>b</sup> |
| <i>L. thermotolerans</i> | CBS 1877  | CBS-KNAW  | Italy                          | Europe            | grapes                            | grape/wine       | Domestic 1               | na                             |
| <i>L. thermotolerans</i> | CBS 2803  | CBS-KNAW  | Italy                          | Europe            | grapes                            | grape/wine       | Domestic 1               | na                             |
| <i>L. thermotolerans</i> | CBS 2860  | CBS-KNAW  | Italy, Sardinia                | Europe            | grape must                        | grape/wine       | Domestic 1               | Freel et al. 2014 <sup>b</sup> |
| <i>L. thermotolerans</i> | CBS 2907  | CBS-KNAW  | South Africa                   | Africa            | soil                              | soil             | Domestic 2               | Freel et al. 2014 <sup>b</sup> |
| <i>L. thermotolerans</i> | CBS 2917  | CBS-KNAW  | na                             | na                | <i>Drosophila sp.</i>             | insect           | Hawaii/California        | na                             |
| <i>L. thermotolerans</i> | CBS 4728  | CBS-KNAW  | former Czechoslovakia          | Europe            | grapes                            | grape/wine       | Mix E. Europe            | Freel et al. 2014 <sup>b</sup> |
| <i>L. thermotolerans</i> | CBS 5464  | CBS-KNAW  | Australia                      | Australia/Oceania | cotton seed                       | agriculture/food | Hawaii/California        | na                             |
| <i>L. thermotolerans</i> | CBS 6052  | CBS-KNAW  | na                             | na                | na                                | na               | Domestic 1               | na                             |
| <i>L. thermotolerans</i> | CBS 6292  | CBS-KNAW  | Australia                      | Australia/Oceania | na                                | na               | Europe oak/France grapes | na                             |

|                          |                    |                    |                                     |                       |                              |                  |                          |                                                                   |
|--------------------------|--------------------|--------------------|-------------------------------------|-----------------------|------------------------------|------------------|--------------------------|-------------------------------------------------------------------|
| <i>L. thermotolerans</i> | <b>CBS 6340T</b>   | CBS-KNAW           | Russia                              | Russia/Asia           | mirabelle plum conserve      | agriculture/food | Domestic 1               | Freel et al. 2014 <sup>b</sup> , Naumova et al. 2007 <sup>c</sup> |
| <i>L. thermotolerans</i> | <b>CBS 6467</b>    | CBS-KNAW           | Japan                               | Russia/Asia           | tree exudate                 | plant            | Other                    | na                                                                |
| <i>L. thermotolerans</i> | <b>CBS 7772</b>    | CBS-KNAW           | Brazil                              | South/Central America | <i>Uca sp.</i>               | insect           | Americas                 | Freel et al. 2014 <sup>b</sup>                                    |
| <i>L. thermotolerans</i> | <b>CL 41</b>       | University of Leon | Spain                               | Europe                | grapes                       | grape/wine       | Domestic 2               | na                                                                |
| <i>L. thermotolerans</i> | <b>CL 43</b>       | University of Leon | Spain                               | Europe                | grapes                       | grape/wine       | Hawaii/California        | na                                                                |
| <i>L. thermotolerans</i> | CONCERTO™          | CHR Hansen         | "Mediterranean country"             | na                    | na                           | na               | Domestic 1               | na                                                                |
| <i>L. thermotolerans</i> | <b>CRBO L0672</b>  | CRBOeno            | France                              | Europe                | grapes, fermentation         | grape/wine       | Mix Europe/N. America    | na                                                                |
| <i>L. thermotolerans</i> | <b>DBVPG 10092</b> | DBVPG              | Algeria                             | Africa                | soil, apple orchard          | soil             | Domestic 2               | na                                                                |
| <i>L. thermotolerans</i> | <b>DBVPG 2551</b>  | DBVPG              | Italy, Piemonte                     | Europe                | wine cv. Barbera             | grape/wine       | Domestic 2               | Freel et al. 2014 <sup>b</sup>                                    |
| <i>L. thermotolerans</i> | <b>DBVPG 2700</b>  | DBVPG              | Spain, La Mancha, Campo de Santiago | Europe                | grapes cv. Airen             | grape/wine       | Mix Europe/N. America    | Freel et al. 2014 <sup>b</sup>                                    |
| <i>L. thermotolerans</i> | DBVPG 3418         | DBVPG              | Italy                               | Europe                | milk                         | agriculture/food | Domestic 1               | Freel et al. 2014 <sup>b</sup>                                    |
| <i>L. thermotolerans</i> | DBVPG 3464         | DBVPG              | Spain, La Mancha, Valdepenas        | Europe                | grapes                       | grape/wine       | Domestic 1               | Freel et al. 2014 <sup>b</sup>                                    |
| <i>L. thermotolerans</i> | <b>DBVPG 3466</b>  | DBVPG              | Spain, La Mancha, La Encomienda     | Europe                | grapes                       | grape/wine       | Domestic 1               | Freel et al. 2014 <sup>b</sup>                                    |
| <i>L. thermotolerans</i> | <b>DBVPG 3469</b>  | DBVPG              | Spain, La Mancha, Manzanares        | Europe                | grapes                       | grape/wine       | Mix Europe/N. America    | Freel et al. 2014 <sup>b</sup>                                    |
| <i>L. thermotolerans</i> | <b>DBVPG 4014</b>  | DBVPG              | Italy                               | Europe                | caverns                      | soil             | Domestic 1               | Freel et al. 2014 <sup>b</sup>                                    |
| <i>L. thermotolerans</i> | <b>DBVPG 4035</b>  | DBVPG              | ex Yugoslavia                       | Europe                | grapes, must                 | grape/wine       | Domestic 1               | Freel et al. 2014 <sup>b</sup>                                    |
| <i>L. thermotolerans</i> | <b>DBVPG 6322</b>  | DBVPG              | Italy                               | Europe                | grapes                       | grape/wine       | Domestic 2               | na                                                                |
| <i>L. thermotolerans</i> | <b>DBVPG 6326</b>  | DBVPG              | Italy                               | Europe                | grapes, raisins              | grape/wine       | Domestic 2               | na                                                                |
| <i>L. thermotolerans</i> | DBVPG 6867         | DBVPG              | Brazil                              | South/Central America | <i>Pilosocereus arrabida</i> | plant            | Americas                 | Freel et al. 2014 <sup>b</sup>                                    |
| <i>L. thermotolerans</i> | DV 87-18           | na                 | "Far East"                          | Russia/Asia           | <i>Quercus sp.</i> exudate   | plant            | Other                    | Naumova et al. 2007 <sup>c</sup>                                  |
| <i>L. thermotolerans</i> | <b>Fin. 89-11</b>  | na                 | Finland                             | Europe                | <i>Quercus sp.</i> exudate   | plant            | Europe oak/France grapes | Naumova et al. 2007 <sup>c</sup>                                  |
| <i>L. thermotolerans</i> | <b>Fin. 89-2</b>   | na                 | Finland                             | Europe                | <i>Quercus sp.</i> exudate   | plant            | Europe oak/France grapes | Freel et al. 2014 <sup>b</sup> , Naumova et al. 2007 <sup>c</sup> |
| <i>L. thermotolerans</i> | <b>FRI10C.1</b>    | NCYC               | UK, Fritham, New Forest             | Europe                | <i>Quercus sp.</i>           | plant            | Europe oak/France grapes | Robinson et al. 2016 <sup>d</sup>                                 |
| <i>L. thermotolerans</i> | <b>HU 2511</b>     | BOKU               | Austria                             | Europe                | grapes                       | grape/wine       | Domestic 2               | na                                                                |
| <i>L. thermotolerans</i> | <b>IMAT 2508</b>   | IMAT               | na                                  | na                    | na                           | na               | Domestic 2               | na                                                                |
| <i>L. thermotolerans</i> | IMAT 2510          | IMAT               | na                                  | na                    | na                           | na               | Domestic 2               | na                                                                |
| <i>L. thermotolerans</i> | <b>ISVV Ltyq25</b> | ISVV               | France, Sauternes                   | Europe                | grapes, high sugar must      | grape/wine       | Europe oak/France grapes | na                                                                |
| <i>L. thermotolerans</i> | <b>ISVV Ltyq3</b>  | ISVV               | France, Sauternes                   | Europe                | grapes, high sugar must      | grape/wine       | Europe oak/France grapes | na                                                                |

|                          |                   |      |                                                     |               |                                 |            |                          |                                   |
|--------------------------|-------------------|------|-----------------------------------------------------|---------------|---------------------------------|------------|--------------------------|-----------------------------------|
| <i>L. thermotolerans</i> | ISVV Ltyq36       | ISVV | France, Sauternes                                   | Europe        | grapes, high sugar must         | grape/wine | Europe oak/France grapes | na                                |
| <i>L. thermotolerans</i> | JCB1              | ISVV | France, Sauternes                                   | Europe        | grapes, high sugar must         | grape/wine | Domestic 1               | na                                |
| <i>L. thermotolerans</i> | KEH.34.B.3        | na   | USA, Missouri, Ste. Genevieve                       | North America | grapes, fermentation            | grape/wine | Canada trees             | Freel et al. 2014 <sup>b</sup>    |
| <i>L. thermotolerans</i> | LEVULIA® ALCOMENO | AEB  | France, Burgundy                                    | Europe        | grapes, fermentation            | grape/wine | Europe oak/France grapes | na                                |
| <i>L. thermotolerans</i> | LL12_031          | LL   | Canada                                              | North America | <i>Quercus sp.</i> tree bark    | plant      | Canada trees             | na                                |
| <i>L. thermotolerans</i> | LL12_036          | LL   | Canada                                              | North America | <i>Acer sp.</i> bark            | plant      | Canada trees             | na                                |
| <i>L. thermotolerans</i> | LL12_040          | LL   | Canada                                              | North America | <i>Acer sp.</i> bark            | plant      | Mix Europe/N. America    | na                                |
| <i>L. thermotolerans</i> | LL12_041          | LL   | Canada                                              | North America | <i>Quercus sp.</i> bark         | plant      | Mix Europe/N. America    | na                                |
| <i>L. thermotolerans</i> | LL12_056          | LL   | Canada                                              | North America | planted <i>Quercus sp.</i> bark | plant      | Canada trees             | na                                |
| <i>L. thermotolerans</i> | LL13-038          | LL   | USA, Massachusetts, Woburn                          | North America | <i>Quercus sp.</i> bark         | plant      | Mix Europe/N. America    | na                                |
| <i>L. thermotolerans</i> | LL13-171          | LL   | Canada, New-Brunswick, Oak Point<br>Provincial Park | North America | <i>Quercus sp.</i> bark         | plant      | Canada trees             | na                                |
| <i>L. thermotolerans</i> | LL13-175          | LL   | Canada, New-Brunswick, Oak Point<br>Provincial Park | North America | <i>Quercus sp.</i> bark         | plant      | Canada trees             | na                                |
| <i>L. thermotolerans</i> | LL13-178          | LL   | Canada, New-Brunswick, Oak Point<br>Provincial Park | North America | <i>Quercus sp.</i> bark         | plant      | Canada trees             | na                                |
| <i>L. thermotolerans</i> | LL13-179          | LL   | Canada, New-Brunswick, Oak Point<br>Provincial Park | North America | <i>Quercus sp.</i> bark         | plant      | Canada trees             | na                                |
| <i>L. thermotolerans</i> | LL13-189          | LL   | Canada, New-Brunswick, Oak Point<br>Provincial Park | North America | <i>Quercus sp.</i> bark         | plant      | Canada trees             | na                                |
| <i>L. thermotolerans</i> | LL13-192          | LL   | Canada, New-Brunswick, Oak Point<br>Provincial Park | North America | <i>Quercus sp.</i> bark         | plant      | Canada trees             | na                                |
| <i>L. thermotolerans</i> | LL13-194          | LL   | Canada, New-Brunswick, Oak Point<br>Provincial Park | North America | <i>Quercus sp.</i> bark         | plant      | Canada trees             | na                                |
| <i>L. thermotolerans</i> | LL13-198          | LL   | Canada, New-Brunswick, Oak Point<br>Provincial Park | North America | <i>Quercus sp.</i> bark         | plant      | Canada trees             | na                                |
| <i>L. thermotolerans</i> | LL13-199          | LL   | Canada, New-Brunswick, Oak Point<br>Provincial Park | North America | <i>Quercus sp.</i> bark         | plant      | Canada trees             | na                                |
| <i>L. thermotolerans</i> | MB10D.1           | NCYC | France, Montbarri                                   | Europe        | <i>Quercus sp.</i>              | plant      | Europe oak/France grapes | Robinson et al. 2016 <sup>d</sup> |
| <i>L. thermotolerans</i> | MB15D.1           | NCYC | France, Montbarri                                   | Europe        | <i>Quercus sp.</i>              | plant      | Europe oak/France grapes | Robinson et al. 2016 <sup>d</sup> |

|                          |                      |                            |                              |                       |                                                      |            |                          |                                   |
|--------------------------|----------------------|----------------------------|------------------------------|-----------------------|------------------------------------------------------|------------|--------------------------|-----------------------------------|
| <i>L. thermotolerans</i> | MELODY™              | CHR Hansen                 | Mediterranean country"       | na                    | na                                                   | na         | Domestic 1               | na                                |
| <i>L. thermotolerans</i> | <b>MUCL 31341</b>    | MUCL                       | Italy                        | Europe                | wine                                                 | grape/wine | Domestic 1               | Freel et al. 2014 <sup>b</sup>    |
| <i>L. thermotolerans</i> | <b>MUCL 31342</b>    | MUCL                       | Italy                        | Europe                | wine                                                 | grape/wine | Domestic 1               | na                                |
| <i>L. thermotolerans</i> | MUCL 31343           | MUCL                       | Italy                        | Europe                | grapes, fermentation                                 | grape/wine | Domestic 1               | na                                |
| <i>L. thermotolerans</i> | MUCL 31349           | MUCL                       | Italy                        | Europe                | wine                                                 | grape/wine | Domestic 1               | na                                |
| <i>L. thermotolerans</i> | <b>MUCL 47720</b>    | MUCL                       | Italy                        | Europe                | wine                                                 | grape/wine | Domestic 1               | na                                |
| <i>L. thermotolerans</i> | <b>NCAIM Y.00775</b> | NCAIM                      | Hungary, Babat               | Europe                | <i>Carpinus betulu</i> exudate                       | plant      | Mix Europe/N. America    | na                                |
| <i>L. thermotolerans</i> | <b>NCAIM Y.00798</b> | NCAIM                      | Hungary, Csikóváralka        | Europe                | brown rotten <i>Quercus</i> sp.                      | plant      | Mix Europe/N. America    | na                                |
| <i>L. thermotolerans</i> | <b>NCAIM Y.00873</b> | NCAIM                      | Hungary, Budapest            | Europe                | rotten material of a cavity of <i>Betula pendula</i> | plant      | Mix E. Europe            | na                                |
| <i>L. thermotolerans</i> | <b>NCAIM Y.01703</b> | NCAIM                      | Hungary, Nagyeged            | Europe                | grapes                                               | grape/wine | Mix Europe/N. America    | na                                |
| <i>L. thermotolerans</i> | <i>NEM 1</i>         | ITAP-DEMETER               | Greece                       | Europe                | grapes                                               | grape/wine | Domestic 1               | na                                |
| <i>L. thermotolerans</i> | <i>NEM 12</i>        | ITAP-DEMETER               | Greece                       | Europe                | grapes                                               | grape/wine | Mix Europe/N. America    | na                                |
| <i>L. thermotolerans</i> | <i>NEM 3</i>         | ITAP-DEMETER               | Greece                       | Europe                | grapes                                               | grape/wine | Domestic 1               | na                                |
| <i>L. thermotolerans</i> | <i>NEM 5</i>         | ITAP-DEMETER               | Greece                       | Europe                | grapes                                               | grape/wine | Domestic 1               | na                                |
| <i>L. thermotolerans</i> | <i>NEM 6</i>         | ITAP-DEMETER               | Greece                       | Europe                | grapes                                               | grape/wine | Domestic 1               | na                                |
| <i>L. thermotolerans</i> | <i>NEM 7</i>         | ITAP-DEMETER               | Greece                       | Europe                | grapes                                               | grape/wine | Domestic 1               | na                                |
| <i>L. thermotolerans</i> | <b>NRLL Y-2193</b>   | NRRL/ARS                   | USA, San Jacinto, California | North America         | <i>Drosophila pseudoobscura</i>                      | insect     | Americas                 | na                                |
| <i>L. thermotolerans</i> | <b>NRLL Y-2196</b>   | NRRL/ARS                   | USA, San Jacinto, California | North America         | <i>Drosophila pseudoobscura</i>                      | insect     | Hawaii/California        | na                                |
| <i>L. thermotolerans</i> | <b>NRLL Y-2197</b>   | NRRL/ARS                   | USA, San Jacinto, California | North America         | <i>Drosophila pseudoobscura</i>                      | insect     | Americas                 | na                                |
| <i>L. thermotolerans</i> | <b>NRLL Y-27329</b>  | NRRL/ARS                   | USA, West Virginia           | North America         | grapes                                               | grape/wine | Domestic 2               | na                                |
| <i>L. thermotolerans</i> | <b>NRLL Y-27911</b>  | NRRL/ARS                   | USA, Louisiana               | North America         | gut of a fishfly                                     | insect     | Americas                 | Freel et al. 2014 <sup>b</sup>    |
| <i>L. thermotolerans</i> | <b>NRLL Y-27937</b>  | NRRL/ARS                   | USA, Louisiana               | North America         | surface of fishfly                                   | insect     | Canada trees             | Freel et al. 2014 <sup>b</sup>    |
| <i>L. thermotolerans</i> | NRLL YB-3379         | NRRL/ARS                   | USA, Marion, Illinois        | North America         | rotten log                                           | plant      | Domestic 2               | na                                |
| <i>L. thermotolerans</i> | <b>NZ156</b>         | CRPR                       | New Zealand                  | Australia/Oceania     | grapes cv. Chardonnay                                | grape/wine | Domestic 1               | na                                |
| <i>L. thermotolerans</i> | <b>OCK6C.1</b>       | NCYC                       | UK, Ocknell, New Forest      | Europe                | <i>Quercus</i> sp.                                   | plant      | Europe oak/France grapes | Robinson et al. 2016 <sup>d</sup> |
| <i>L. thermotolerans</i> | <b>OSU A</b>         | OSU                        | USA, Oregon                  | North America         | grapes                                               | grape/wine | Mix Europe/N. America    | na                                |
| <i>L. thermotolerans</i> | <b>PLU5B.1</b>       | NCYC                       | UK, Plumpton vineyard        | Europe                | <i>Quercus</i> sp.                                   | plant      | Europe oak/France grapes | Robinson et al. 2016 <sup>d</sup> |
| <i>L. thermotolerans</i> | <b>PYR14B.1</b>      | NCYC                       | Greece, Pyradikia            | Europe                | <i>Quercus</i> sp.                                   | plant      | Domestic 1               | Robinson et al. 2016 <sup>d</sup> |
| <i>L. thermotolerans</i> | <b>T 13/17 F</b>     | University of the Republic | Uruguay                      | South/Central America | grapes cv. Tannat                                    | grape/wine | Domestic 2               | na                                |

|                          |                        |       |                                  |                       |                                                  |            |                       |                                                                   |
|--------------------------|------------------------|-------|----------------------------------|-----------------------|--------------------------------------------------|------------|-----------------------|-------------------------------------------------------------------|
| <i>L. thermotolerans</i> | <b>TAX9D.1</b>         | NCYC  | Greece, Taxiarchis               | Europe                | <i>Quercus sp.</i>                               | plant      | Mix Europe/N. America | Robinson et al. 2016 <sup>d</sup>                                 |
| <i>L. thermotolerans</i> | <b>UNIFG 26</b>        | UNIFG | Italy                            | Europe                | wine                                             | grape/wine | Domestic 1            | na                                                                |
| <i>L. thermotolerans</i> | <b>UNIFG 28</b>        | UNIFG | Italy                            | Europe                | wine                                             | grape/wine | Domestic 2            | na                                                                |
| <i>L. thermotolerans</i> | <b>UNIFG 16</b>        | UNIFG | Italy                            | Europe                | wine                                             | grape/wine | Domestic 2            | na                                                                |
| <i>L. thermotolerans</i> | <b>UNIFG 17</b>        | UNIFG | Italy                            | Europe                | wine                                             | grape/wine | Domestic 2            | na                                                                |
| <i>L. thermotolerans</i> | <b>UNIFG 18</b>        | UNIFG | Italy                            | Europe                | wine                                             | grape/wine | Domestic 2            | na                                                                |
| <i>L. thermotolerans</i> | <b>UNIFG 22</b>        | UNIFG | Italy                            | Europe                | wine                                             | grape/wine | Domestic 2            | na                                                                |
| <i>L. thermotolerans</i> | <b>UNIFG 32</b>        | UNIFG | Italy                            | Europe                | wine                                             | grape/wine | Domestic 2            | na                                                                |
| <i>L. thermotolerans</i> | UNIFG 33               | UNIFG | Italy                            | Europe                | wine                                             | grape/wine | Domestic 2            | na                                                                |
| <i>L. thermotolerans</i> | <b>UWOPS 79-110</b>    | UWOPS | Canada, Ontario                  | North America         | black knot, <i>Prunus virginiana</i>             | plant      | Canada trees          | Freel et al. 2014 <sup>b</sup>                                    |
| <i>L. thermotolerans</i> | <b>UWOPS 79-116</b>    | UWOPS | Canada, Pinery                   | North America         | black knot, <i>Prunus virginiana</i>             | plant      | Canada trees          | Freel et al. 2014 <sup>b</sup>                                    |
| <i>L. thermotolerans</i> | <b>UWOPS 79-117</b>    | UWOPS | Canada, Pinery                   | North America         | black knot, <i>Prunus virginiana</i>             | plant      | Mix Europe/N. America | Freel et al. 2014 <sup>b</sup>                                    |
| <i>L. thermotolerans</i> | UWOPS 79-162           | UWOPS | Canada, Ontario, Melbourne       | North America         | black knot, <i>Quercus rubra</i>                 | plant      | Mix Europe/N. America | Freel et al. 2014 <sup>b</sup>                                    |
| <i>L. thermotolerans</i> | <b>UWOPS 79-164</b>    | UWOPS | Canada, Ontario, Melbourne       | North America         | black knot, <i>Prunus virginiana</i>             | plant      | Canada trees          | Freel et al. 2014 <sup>b</sup>                                    |
| <i>L. thermotolerans</i> | <b>UWOPS 79-195</b>    | UWOPS | Canada, Ontario, Melbourne       | North America         | black knot, <i>Prunus virginiana</i>             | plant      | Canada trees          | Freel et al. 2014 <sup>b</sup>                                    |
| <i>L. thermotolerans</i> | UWOPS 79-248           | UWOPS | Canada, Ontario                  | North America         | frass, Birch                                     | plant      | Mix Europe/N. America | Freel et al. 2014 <sup>b</sup>                                    |
| <i>L. thermotolerans</i> | <b>UWOPS 79-255</b>    | UWOPS | Canada, Ontario                  | North America         | black knot, <i>Prunus pumila</i>                 | plant      | Canada trees          | Freel et al. 2014 <sup>b</sup>                                    |
| <i>L. thermotolerans</i> | UWOPS 80-19            | UWOPS | Canada, Ontario                  | North America         | black knot, <i>Prunus virginiana</i>             | plant      | Canada trees          | Freel et al. 2014 <sup>b</sup>                                    |
| <i>L. thermotolerans</i> | <b>UWOPS 83-1097.1</b> | UWOPS | Cayman Islands, Cayman Brac      | South/Central America | <i>Gitona americana, Opuntia stricta</i>         | plant      | Americas              | Freel et al. 2014 <sup>b</sup> , Naumova et al. 2007 <sup>c</sup> |
| <i>L. thermotolerans</i> | <b>UWOPS 83-1101.1</b> | UWOPS | Cayman Islands, Cayman Brac      | South/Central America | <i>Gitona americana, Opuntia stricta</i>         | insect     | Americas              | Freel et al. 2014 <sup>b</sup>                                    |
| <i>L. thermotolerans</i> | <b>UWOPS 85-312.1</b>  | UWOPS | USA, Arizona, Tuscon             | North America         | <i>Drosophila carbonaria, Prosopis juliflora</i> | insect     | Americas              | Freel et al. 2014 <sup>b</sup>                                    |
| <i>L. thermotolerans</i> | <b>UWOPS 85-51.1</b>   | UWOPS | USA, Florida, Big Pine Key       | North America         | <i>Opuntia cubensis</i>                          | plant      | Americas              | Freel et al. 2014 <sup>b</sup>                                    |
| <i>L. thermotolerans</i> | <b>UWOPS 90-10.1</b>   | UWOPS | Bahamas, Exumas Cays, Shroud Cay | South/Central America | Columnar cactus                                  | plant      | Americas              | Freel et al. 2014 <sup>b</sup>                                    |
| <i>L. thermotolerans</i> | UWOPS 90-1020.1        | UWOPS | Bahamas, Exumas Cays, Shroud Cay | South/Central America | coco plum                                        | plant      | Americas              | Freel et al. 2014 <sup>b</sup>                                    |
| <i>L. thermotolerans</i> | UWOPS 91-902.1         | UWOPS | Hawaii, Saddle Rd Park           | Australia/Oceania     | flux (white), <i>Myoporum</i>                    | plant      | Hawaii/California     | Freel et al. 2014 <sup>b</sup>                                    |
| <i>L. thermotolerans</i> | <b>UWOPS 91-910.1</b>  | UWOPS | Hawaii, Saddle Rd Park           | Australia/Oceania     | flux (pink), <i>Myoporum</i>                     | plant      | Hawaii/California     | Freel et al. 2014 <sup>b</sup>                                    |
| <i>L. thermotolerans</i> | <b>UWOPS 91-912.1</b>  | UWOPS | Hawaii, Saddle Rd Park           | Australia/Oceania     | flux (white), <i>Myoporum</i>                    | plant      | Hawaii/California     | Freel et al. 2014 <sup>b</sup>                                    |

|                          |                       |          |                 |                       |                                                           |                  |                          |                                   |
|--------------------------|-----------------------|----------|-----------------|-----------------------|-----------------------------------------------------------|------------------|--------------------------|-----------------------------------|
| <i>L. thermotolerans</i> | <b>UWOPS 94-426.2</b> | UWOPS    | Mexico, Jalisco | South/Central America | distillery, agave must                                    | agriculture/food | Domestic 1               | Freel et al. 2014 <sup>b</sup>    |
| <i>L. thermotolerans</i> | YJS4269               | na       | Ukraine         | Europe                | <i>Drosophila sp.</i>                                     | insect           | Americas                 | na                                |
| <i>L. thermotolerans</i> | Y1017                 | IWBT     | South Africa    | Africa                | grapes cv. Chardonnay                                     | grape/wine       | Domestic 2               | na                                |
| <i>L. thermotolerans</i> | Y1038                 | IWBT     | South Africa    | Africa                | grapes cv. Chardonnay                                     | grape/wine       | Domestic 2               | na                                |
| <i>L. thermotolerans</i> | Y1109                 | IWBT     | South Africa    | Africa                | grapes cv. Sauvignon blanc                                | grape/wine       | Domestic 2               | na                                |
| <i>L. thermotolerans</i> | Y1202                 | IWBT     | South Africa    | Africa                | grapes cv. Sauvignon blanc                                | grape/wine       | Domestic 2               | na                                |
| <i>L. thermotolerans</i> | Y1206                 | IWBT     | South Africa    | Africa                | grapes cv. Sauvignon blanc                                | grape/wine       | Domestic 2               | na                                |
| <i>L. thermotolerans</i> | Y1295                 | IWBT     | South Africa    | Africa                | grapes, fermentation (Sauvignon blanc – Chardonnay blend) | grape/wine       | Domestic 2               | na                                |
| <i>L. thermotolerans</i> | Y905                  | IWBT     | South Africa    | Africa                | grapes cv. Chenin blanc                                   | grape/wine       | Domestic 2               | na                                |
| <i>L. thermotolerans</i> | <b>Yal. 87-1</b>      | na       | Russia, Crimea  | Russia/Asia           | <i>Quercus sp. exudate</i>                                | plant            | Europe oak/France grapes | Naumova et al. 2007 <sup>c</sup>  |
| <i>L. thermotolerans</i> | <b>Yal. 87-2</b>      | na       | Finland         | Europe                | <i>Quercus sp. exudate</i>                                | plant            | Other                    | Naumova et al. 2007 <sup>c</sup>  |
| <i>L. thermotolerans</i> | <b>Yal. 87-5</b>      | na       | Russia, Crimea  | Russia/Asia           | <i>Quercus sp. exudate</i>                                | plant            | Mix E. Europe            | Naumova et al. 2007 <sup>c</sup>  |
| <i>L. thermotolerans</i> | <b>ZIM 2492</b>       | ZIM      | Serbia          | Europe                | rasberries                                                | agriculture/food | Domestic 1               | na                                |
| <i>L. thermotolerans</i> | <b>ZIM 2505</b>       | ZIM      | Serbia          | Europe                | rasberries                                                | agriculture/food | Mix Europe/N. America    | na                                |
| <i>L. cidri</i>          | <b>CBS 4575T</b>      | CBS-KNAW | na              | na                    | na                                                        | na               | na                       | na                                |
| <i>L. dasiensis</i>      | <b>CBS 10888T</b>     | CBS-KNAW | na              | na                    | na                                                        | na               | na                       | Lee et al. 2009 <sup>d</sup>      |
| <i>L. fantastica</i>     | <b>CBS 6924T</b>      | CBS-KNAW | na              | na                    | na                                                        | na               | na                       | na                                |
| <i>L. fermentati</i>     | <b>CBS 707T</b>       | CBS-KNAW | na              | na                    | na                                                        | na               | na                       | na                                |
| <i>L. kluyverii</i>      | <b>CBS 3082T</b>      | CBS-KNAW | na              | na                    | na                                                        | na               | na                       | na                                |
| <i>L. lanzarotensis</i>  | <b>CBS 12615T</b>     | CBS-KNAW | na              | na                    | na                                                        | na               | na                       | Gonzalez et al. 2013 <sup>f</sup> |
| <i>L. meyersii</i>       | <b>CBS 8951T</b>      | CBS-KNAW | na              | na                    | na                                                        | na               | na                       | Fell et al. 2004 <sup>g</sup>     |
| <i>L. mirantina</i>      | <b>CBS 11717T</b>     | CBS-KNAW | na              | na                    | na                                                        | na               | na                       | Pereira et al. 2011 <sup>h</sup>  |
| <i>L. nothofagi</i>      | <b>CBS 11611T</b>     | CBS-KNAW | na              | na                    | na                                                        | na               | na                       | Mestre et al. 2010 <sup>i</sup>   |
| <i>L. quebecensis</i>    | <b>CBS 14138T</b>     | CBS-KNAW | na              | na                    | na                                                        | na               | na                       | Freel et al. 2016 <sup>j</sup>    |
| <i>L. waltii</i>         | <b>CBS 6430T</b>      | CBS-KNAW | na              | na                    | na                                                        | na               | na                       | na                                |

**Phaff YCC** – Phaff Yeast Culture Collection, University of Davis, California, USA; **AWMCC** - AWRI Wine Microorganism Culture Collection, Australia; **CBS-KNAW** - Centraalbureau voor Schimmelcultures – Koninklijke Nederlandse Akademie van Wetenschappen, Netherlands; **CRBOeno** - Centre de Ressources Biologiques Oenologie, France; **DBVPG** - The Industrial Yeasts Collection DBVPG, Italy; **NCYC** - National Collection of Yeast Cultures, UK; Italy; **BOKU** - Universität für Bodenkultur Wien, Austria; **ISVV** - Institut des Sciences de la Vigne et du Vin, France; **LL** – Landry Lab, Canada; **MUCL** - Mycothèque de l'Université

catholique de Louvain, Belgium; **NCAIM** - National Collection of Agricultural and Industrial Microorganisms, Hungary; **ITAP-DEMETER** - Institute of Technology of Agricultural Products, Hellenic Agricultural Organisation, Greece; **NRRL/ARS** - NRRL Agriculture Research Service culture collection, USA; **CRPR** - Centre de Recherche Pernod-Ricard, France; **OSU** – Oregon State University, USA; **UNIFG** - University of Foggia; **UWOPS** - Culture collection of the University of Western Ontario; **IWBT** – Institute for Wine Biotechnology, University of Stellenbosch, South Africa; **ZIM** - Zbirka industrijskih mikroorganizmov, Slovenia.

<sup>a</sup>Sipiczki M. Overwintering of vineyard yeasts: Survival of interacting yeast communities in grapes mummified on vines. *Frontiers in microbiology*. 2016 Feb doi: 10.3389/fmicb.2016.00212; <sup>c</sup>Freel KC, Friedrich A, Hou J, Schacherer J. Population genomic analysis reveals highly conserved mitochondrial genomes in the yeast species *Lachancea thermotolerans*. *Genome biology and evolution*. 2014 Oct; 6(10):2586-94.; <sup>c</sup> Naumova ES, Serpova EV, Naumov GI. Molecular systematics of *Lachancea* yeasts. *Biochemistry (Moscow)*. 2007 Dec; 72(12):1356-62.; <sup>d</sup> Robinson HA, Pinharanda A, Bensasson D. Summer temperature can predict the distribution of wild yeast populations. *Ecology and evolution*. 2016 Feb; 6(4):1236-50.; <sup>e</sup> Lee CF, Yao CH, Liu YR, Hsieh CW, Young SS. *Lachancea dasiensis* sp. nov., an ascosporeogenous yeast isolated from soil and leaves in Taiwan. *International journal of systematic and evolutionary microbiology*. 2009 Jul; 59(7):1818-22.; <sup>f</sup> González SS, Alcoba-Flórez J, Laich F. *Lachancea lanzarotensis* sp. nov., an ascomycetous yeast isolated from grapes and wine fermentation in Lanzarote, Canary Islands. *International journal of systematic and evolutionary microbiology*. 2013 Jan; 63(1):358-63.; <sup>g</sup> Fell JW, Statzell-Tallman A, Kurtzman CP. *Lachancea meyersii* sp. nov., an ascosporeogenous yeast from mangrove regions in the Bahama Islands. *Studies in Mycology* 2004 Dec; 50:359-63.; <sup>h</sup> Pereira LF, Costa Jr CR, Brasileiro BT, de Morais Jr MA. *Lachancea mirantina* sp. nov., an ascomycetous yeast isolated from the cachaca fermentation process. *International journal of systematic and evolutionary microbiology*. 2011 Apr; 61(4):989-92.; <sup>i</sup> Mestre MC, Ulloa JR, Rosa CA, Lachance MA, Fontenla S. *Lachancea nothofagi* sp. nov., a yeast associated with *Nothofagus* species in Patagonia, Argentina. *International journal of systematic and evolutionary microbiology*. 2010 Sep; 60(9):2247-50.; <sup>j</sup> Freel KC, Charron G, Leducq JB, Landry CR, Schacherer J. *Lachancea quebecensis* sp. nov., a yeast species consistently isolated from tree bark in the Canadian province of Québec. *International journal of systematic and evolutionary microbiology*. 2015 Oct 1;65(10):3392-9.
