# Supplementary material for: The evolution of Lachancea thermotolerans is driven by geographical determination, anthropisation and flux between different ecosystems
Source: PubMed Central journal article supplement (PMC5599012; doi:10.1371/journal.pone.0184652), 2017-09-14

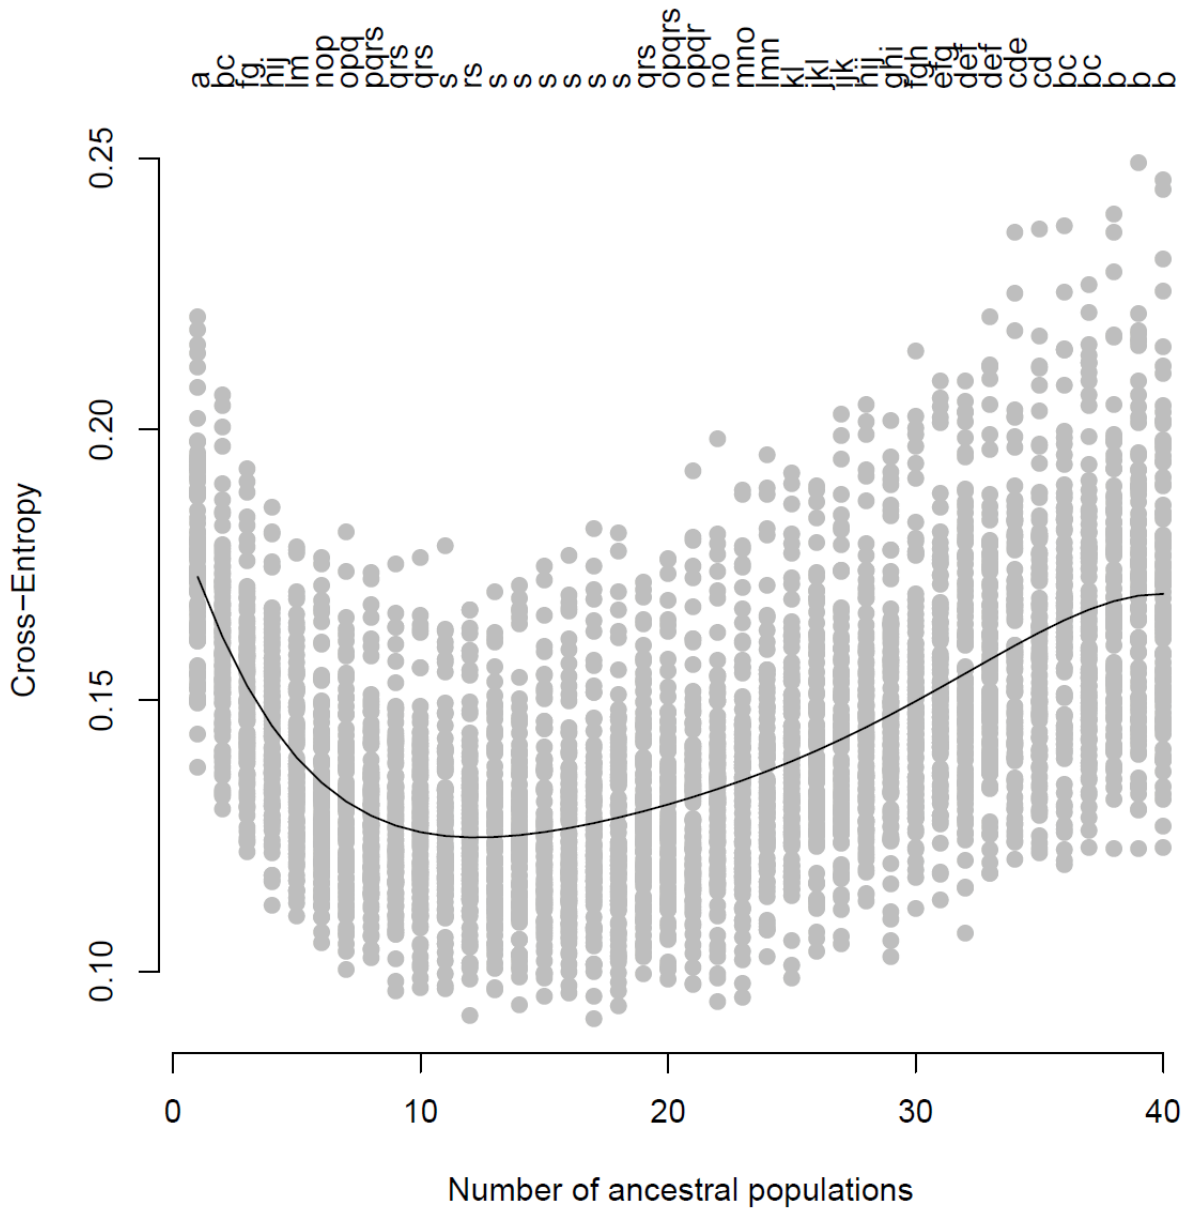

Supplement: pone.0184652.s003.pdf [file pone.0184652.s003.pdf]
